# Supplementary material for: Modulation of AMPK/ TET2/ 5-hmC axis in response to metabolic alterations as a novel pathway for obesity-related colorectal cancer development
Source: PubMed Central journal article supplement (PMC9938119; doi:10.1038/s41598-023-29958-2), 2023-02-17

**Modulation of AMPK/ TET2/ 5-hmC axis in response to  
metabolic alterations as a novel pathway for obesity-related  
colorectal cancer development**

Takashi Kon<sup>1</sup>, Yu Sasaki<sup>1</sup>, Yasuhiko Abe<sup>2</sup>, Yusuke Onozato<sup>1</sup>, Makoto Yagi<sup>2</sup>, Naoko  
Mizumoto<sup>1</sup>, Takayuki Sakai<sup>1</sup>, Matsuki Umehara<sup>1</sup>, Minamin Ito<sup>1</sup>, Shuhei Nakamura<sup>1</sup>,  
Hiroki Goto<sup>1</sup>, Yoshiyuki Ueno<sup>1</sup>

<sup>1</sup>Department of Gastroenterology, Faculty of Medicine, Yamagata University, 2-2-2 Iida-  
Nishi, Yamagata 990-9585, Japan

<sup>2</sup>Division of Endoscopy, Yamagata University Hospital, 2-2-2 Iida-Nishi, Yamagata 990-  
9585, Japan

Corresponding author

Yu Sasaki, MD, PhD

Faculty of Medicine, Department of Gastroenterology, Yamagata University

2-2-2 Iida-Nishi, Yamagata 990-9585, Japan

Tel: +81-23-628-5309 Fax: +81-23-628-5311

E-mail: [y-sasaki@med.id.yamagata-u.ac.jp](mailto:y-sasaki@med.id.yamagata-u.ac.jp)

**Supplementary information accompanying this paper**

**Supplementary Table 1.** Comparison of selected characteristics between obese patients with CRC and non-obese patients with CRC

| <b>Characteristic</b>                  | <b>Ob-CRC (<i>n</i> = 7)</b> | <b>nOb-CRC (<i>n</i> = 7)</b> | <b><i>p</i>-value</b> |
|----------------------------------------|------------------------------|-------------------------------|-----------------------|
| Age (year)                             | 77 (65–80)                   | 77 (71–83)                    | NS (matched)          |
| Male, <i>n</i> (%)                     | 4 (57)                       | 3 (43)                        | NS (matched)          |
| Current smoking, <i>n</i> (%)          | 1 (14)                       | 1 (14)                        | NS                    |
| Alcohol consumption, <i>n</i> (%)      | 2 (29)                       | 1 (14)                        | NS                    |
| VFA (cm <sup>2</sup> )                 | 185.6 (152.1–237.0)          | 31.6 (27.1–96.6)              | < 0.01                |
| BMI (kg/m <sup>2</sup> ) <sup>a</sup>  | 28.7 (27.7–29.2)             | 20.9 (19.1–22.5)              | < 0.01                |
| Diabetes, <i>n</i> (%)                 | 4 (57)                       | 1 (14)                        | NS                    |
| Dyslipidemia, <i>n</i> (%)             | 4 (57)                       | 2 (29)                        | NS                    |
| FPG (mmol/L)                           | 6.0 (5.4–6.2)                | 4.9 (4.8–5.3)                 | < 0.01                |
| HbA1c (%)                              | 6.3 (5.8–7.2)                | 5.8 (5.5–6.6)                 | NS                    |
| FPI (μU/mL)                            | 7.6 (5.4–12.1)               | 4.6 (3.1–4.9)                 | < 0.05                |
| HOMA-IR <sup>b</sup>                   | 2.0 (1.5–3.3)                | 1.1 (0.7–1.2)                 | < 0.05                |
| TG (mmol/L)                            | 1.0 (0.8–2.5)                | 1.7 (1.4–2.0)                 | NS                    |
| TC (mmol/L)                            | 4.7 (3.5–5.0)                | 4.8 (3.7–6.2)                 | NS                    |
| HDL (mmol/L)                           | 1.2 (1.0–1.4)                | 1.22 (1.0–1.4)                | NS                    |
| LDL (mmol/L)                           | 3.0 (2.1–3.2)                | 3.0 (2.3–3.9)                 | NS                    |
| CRC stages <sup>c</sup> , <i>n</i> (%) |                              |                               | NS (matched)          |
| I                                      | 2 (29)                       | 2 (29)                        |                       |
| II                                     | 4 (57)                       | 3 (43)                        |                       |
| III                                    | 1 (14)                       | 2 (29)                        |                       |
| IV                                     | 0 (0)                        | 0 (0)                         |                       |
| Tumor location <sup>d</sup>            |                              |                               | NS (matched)          |
| Right side, <i>n</i> (%)               | 3 (43)                       | 3 (43)                        |                       |
| Left side, <i>n</i> (%)                | 4 (57)                       | 4 (57)                        |                       |

Values are expressed as medians (interquartile range) or numbers (percentage). *p*-values

were obtained using Wilcoxon rank-sum test or the  $\chi^2$  test. <sup>a</sup> BMI was calculated as weight in kilograms divided by height in meters. <sup>b</sup> HOMA-IR = FPI ( $\mu$ IU/mL)  $\times$  FPG (mmol/L)/22.5. <sup>c</sup> Classification of CRC patients based on the 8<sup>th</sup> UICC staging system. <sup>d</sup> Right-sided colon and left-sided colon were defined, as colorectal cancer was located in the proximal to transverse colon and descending colon to rectum, respectively.

Ob-CRC, obese patients with colorectal cancer; nOb-CRC, non-obese patients with colorectal cancer; VFA, visceral fat area; BMI, body mass index; FPI, fasting plasma insulin; HOMA-IR, homeostasis model assessment of insulin resistance; TG, triglyceride; TC, total cholesterol; HDL, high-density lipoprotein; LDL, low-density lipoprotein; NS, not significant; UICC, Union for International Cancer Control.

**Supplementary Table 2.** Primer sequences used for RT-qPCR

| <b>Targets</b>           | <b>Primer sequences</b>                                                       |
|--------------------------|-------------------------------------------------------------------------------|
| <b>Human <i>ACTB</i></b> | Forward: 5'-TTCCTTCCTGGGCATGGAGTCC-3'<br>Reverse: 5'-TGGCGTACAGGTCTTTGCGG-3'  |
| <b>Human <i>TET1</i></b> | Forward: 5'-CAGAACCTAAACCACCCGTG-3'<br>Reverse: 5'-TGCTTCGTAGCGCCATTGTAA-3'   |
| <b>Human <i>TET2</i></b> | Forward: 5'-GGCTACAAAGCTCCAGAATGG-3'<br>Reverse: 5'-AAGAGTGCCACTTGGTGTCTC-3'  |
| <b>Human <i>TET3</i></b> | Forward: 5'-TCCAGCAACTCCTAGAACTGAG-3'<br>Reverse: 5'-AGGCCGCTTGAATACTGACTG-3' |

RT-qPCR, reverse transcription-quantitative polymerase chain reaction; *ACTB*,  $\beta$ -actin;

*TET*, ten-eleven translocation.

**Supplementary Figure 1.** Full-length Western blot images used in Figure 7

Full-length blot images of TET2 (a), phospho-AMPK (b), AMPK (c), and ACTB (d) in Figure 7e. Full-length blot images of TET2 (e), phospho-AMPK (f), AMPK (g), and ACTB (h) in Figure 7f. TET, ten-eleven translocation; AMPK, adenosine monophosphate-activated protein kinase; ACTB,  $\beta$ -actin.

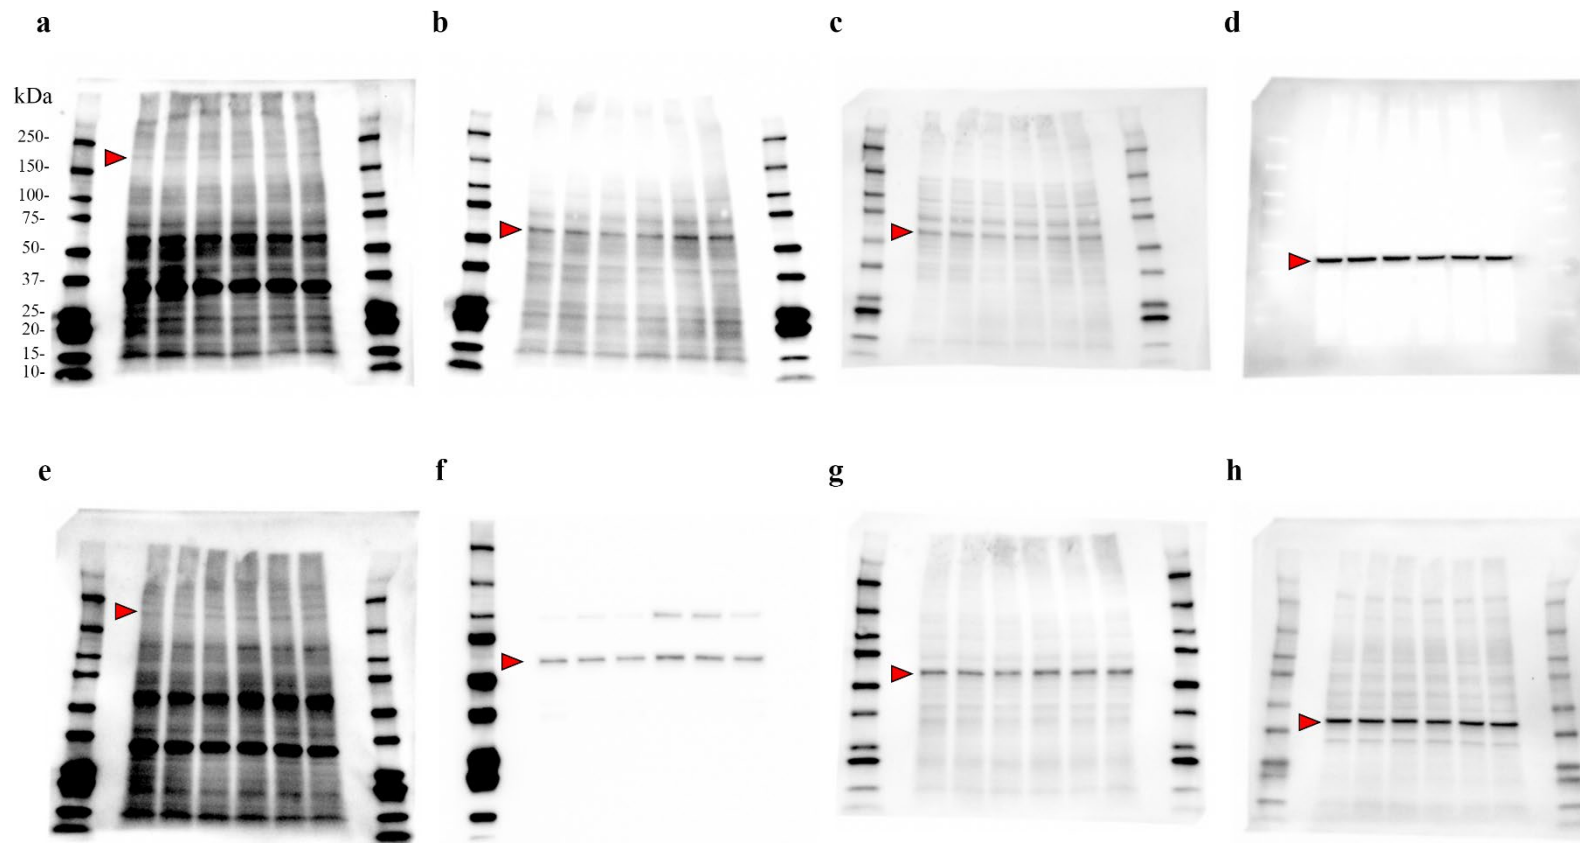

Supplement: 41598_2023_29958_MOESM1_ESM.pdf [file 41598_2023_29958_MOESM1_ESM.pdf]
